# Supplementary material
Source: Elsevier journal article supplement (https://univ-rennes.hal.science/hal-01578543v1/file/mmc1.docx)
Supplement: mmc1 [file mmc1.docx]

**Supporting Information for**

**Photo-physical Properties of Donor-Acceptor-Radical Triad Based on Functionalized Tetrathiafulvalene and Nitronyl Nitroxide Radical**

Haiet Douib,a,c Marin Puget,b Yan Suffren,b Fabrice Pointillart,*a Kevin Bernot,*b Boris Le Guennic,a Olivier Cador,a Abdelkrim Gouasmia,c Lahcène Ouahaba

*a Institut des Sciences Chimiques de Rennes, UMR 6226 CNRS-Université de Rennes 1, 263 Avenue du Général Leclerc, 35042 Rennes Cedex, France*

*b Institut des Sciences Chimiques de Rennes, UMR CNRS 6226, INSA Rennes, 20 Avenue des buttes de Coesmes, 35708 Rennes, France.*

*c Laboratoire des Matériaux Organiques et Hétérochimie (LMOH), Département des sciences de la matière, Université Larbi Tébessi de Tébessa, Route de Constantine 12002, Tébessa, Algérie.*

Corresponding authors: [fabrice.pointillart@univ-rennes1.fr](mailto:fabrice.pointillart@univ-rennes1.fr); [kevin.bernot@insa-rennes.fr](mailto:kevin.bernot@insa-rennes.fr)


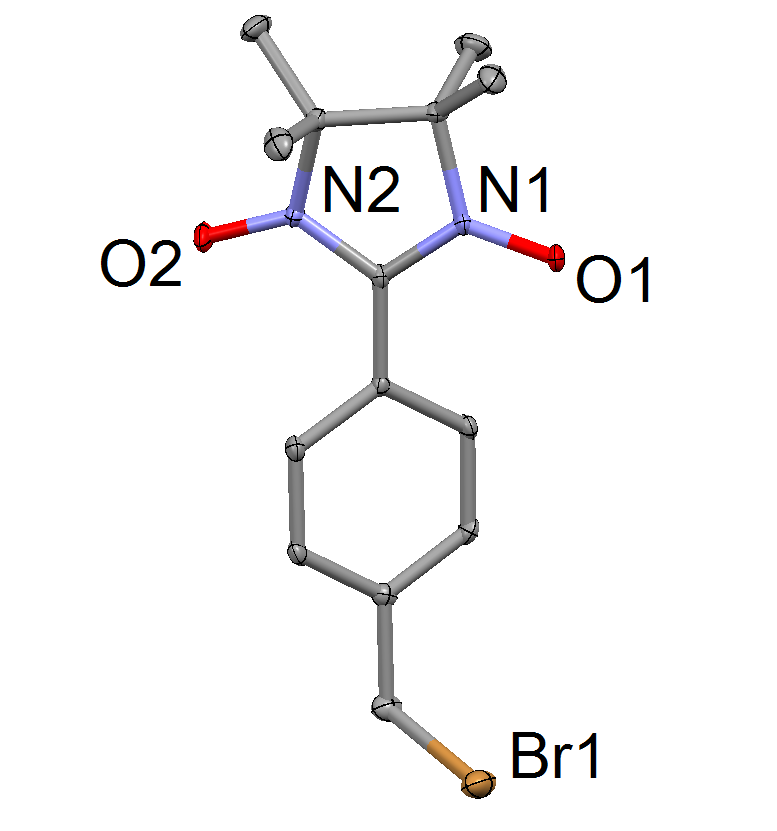


**Fig. S1**. ORTEP view of **2**. Thermal ellipsoids are drawn at 30% probability. Hydrogen atoms are omitted for clarity.


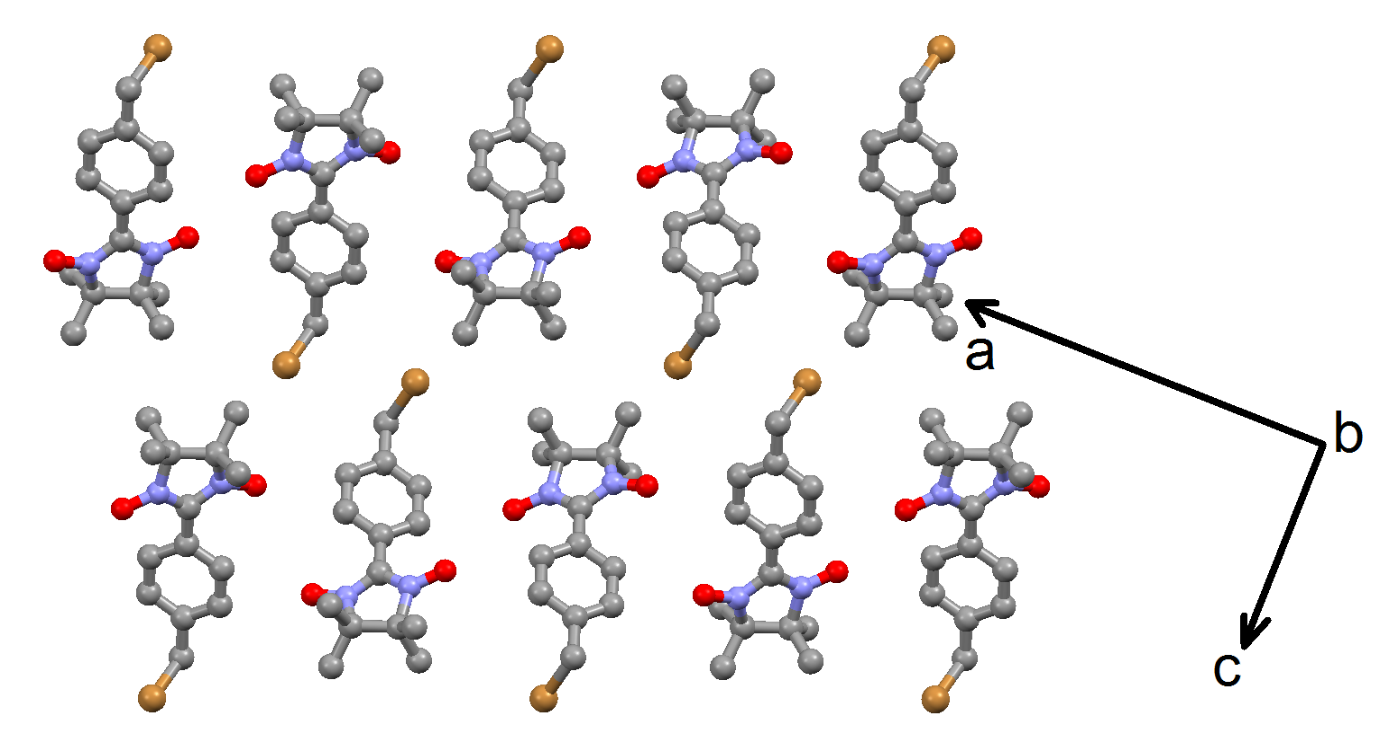


**Fig. S2**. Packing view of **2** in the (010) direction. Hydrogen atoms are omitted for clarity.


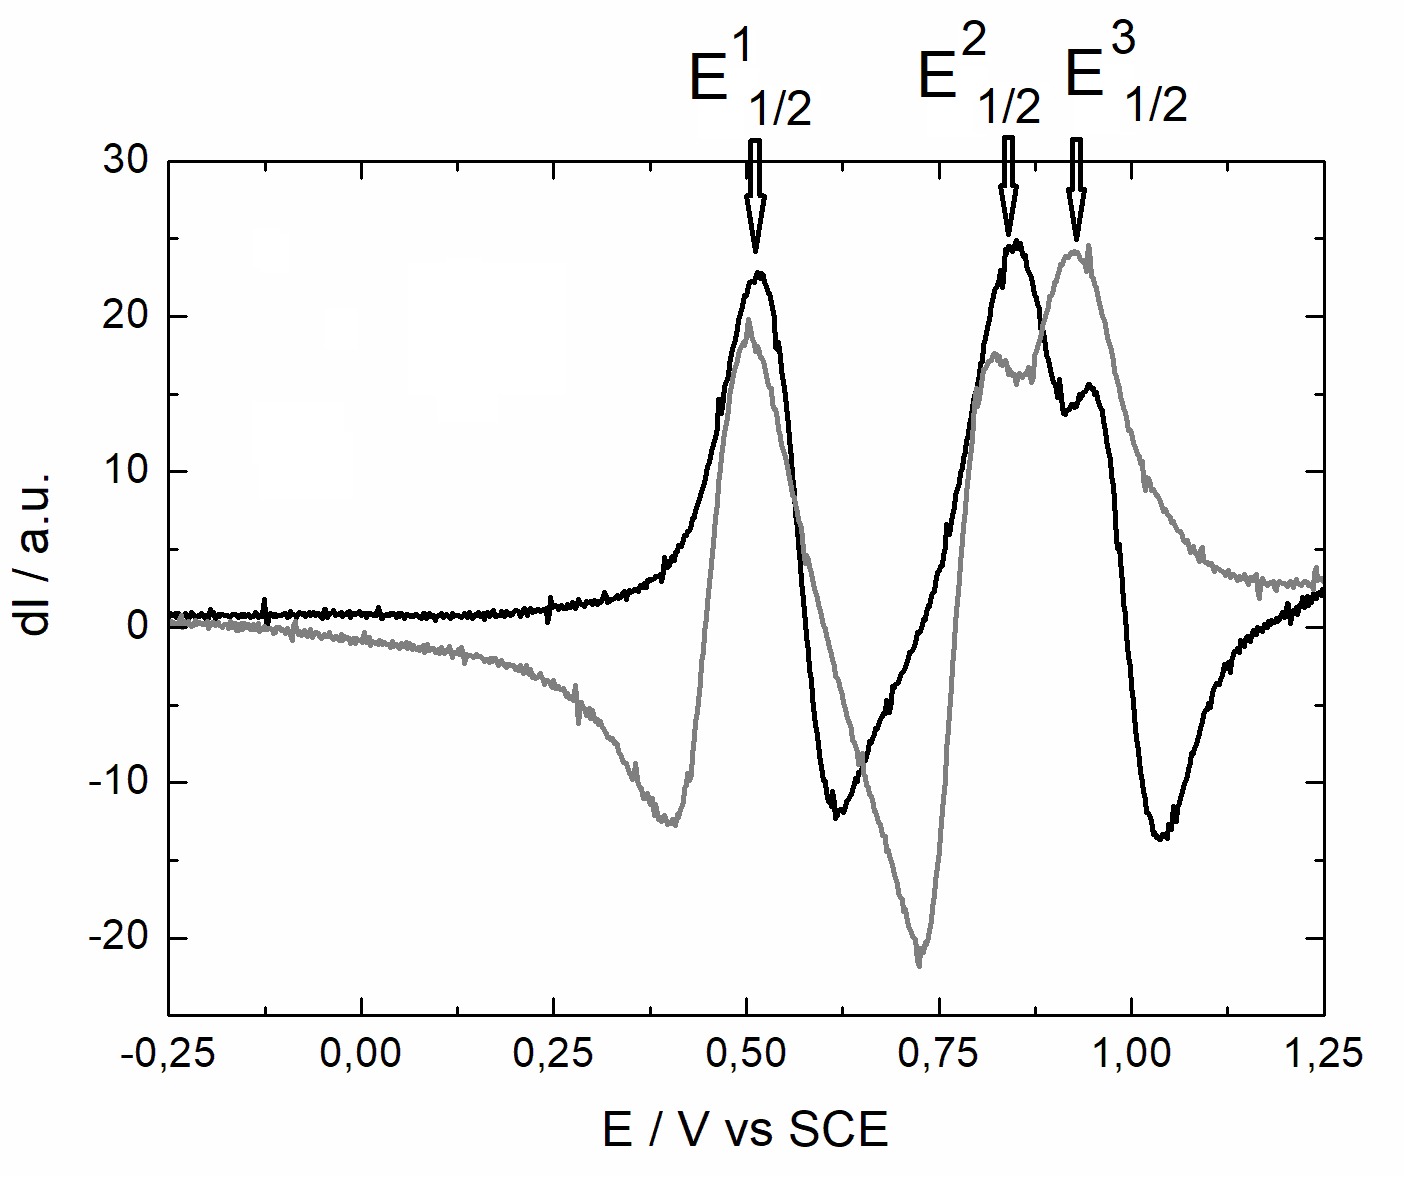


**Fig. S3**. First derivative of the cyclic voltammogram of **3** in oxidation (black curve) and reduction (gray curve) highlighting the three oxidation potentials.





**Fig. S4**. Experimental UV/vis absorption spectra in solution (*c* = 4·10-5 M) of **1** (open triangles), **2** (open squares) and **3** (open circles) in CH2Cl2.


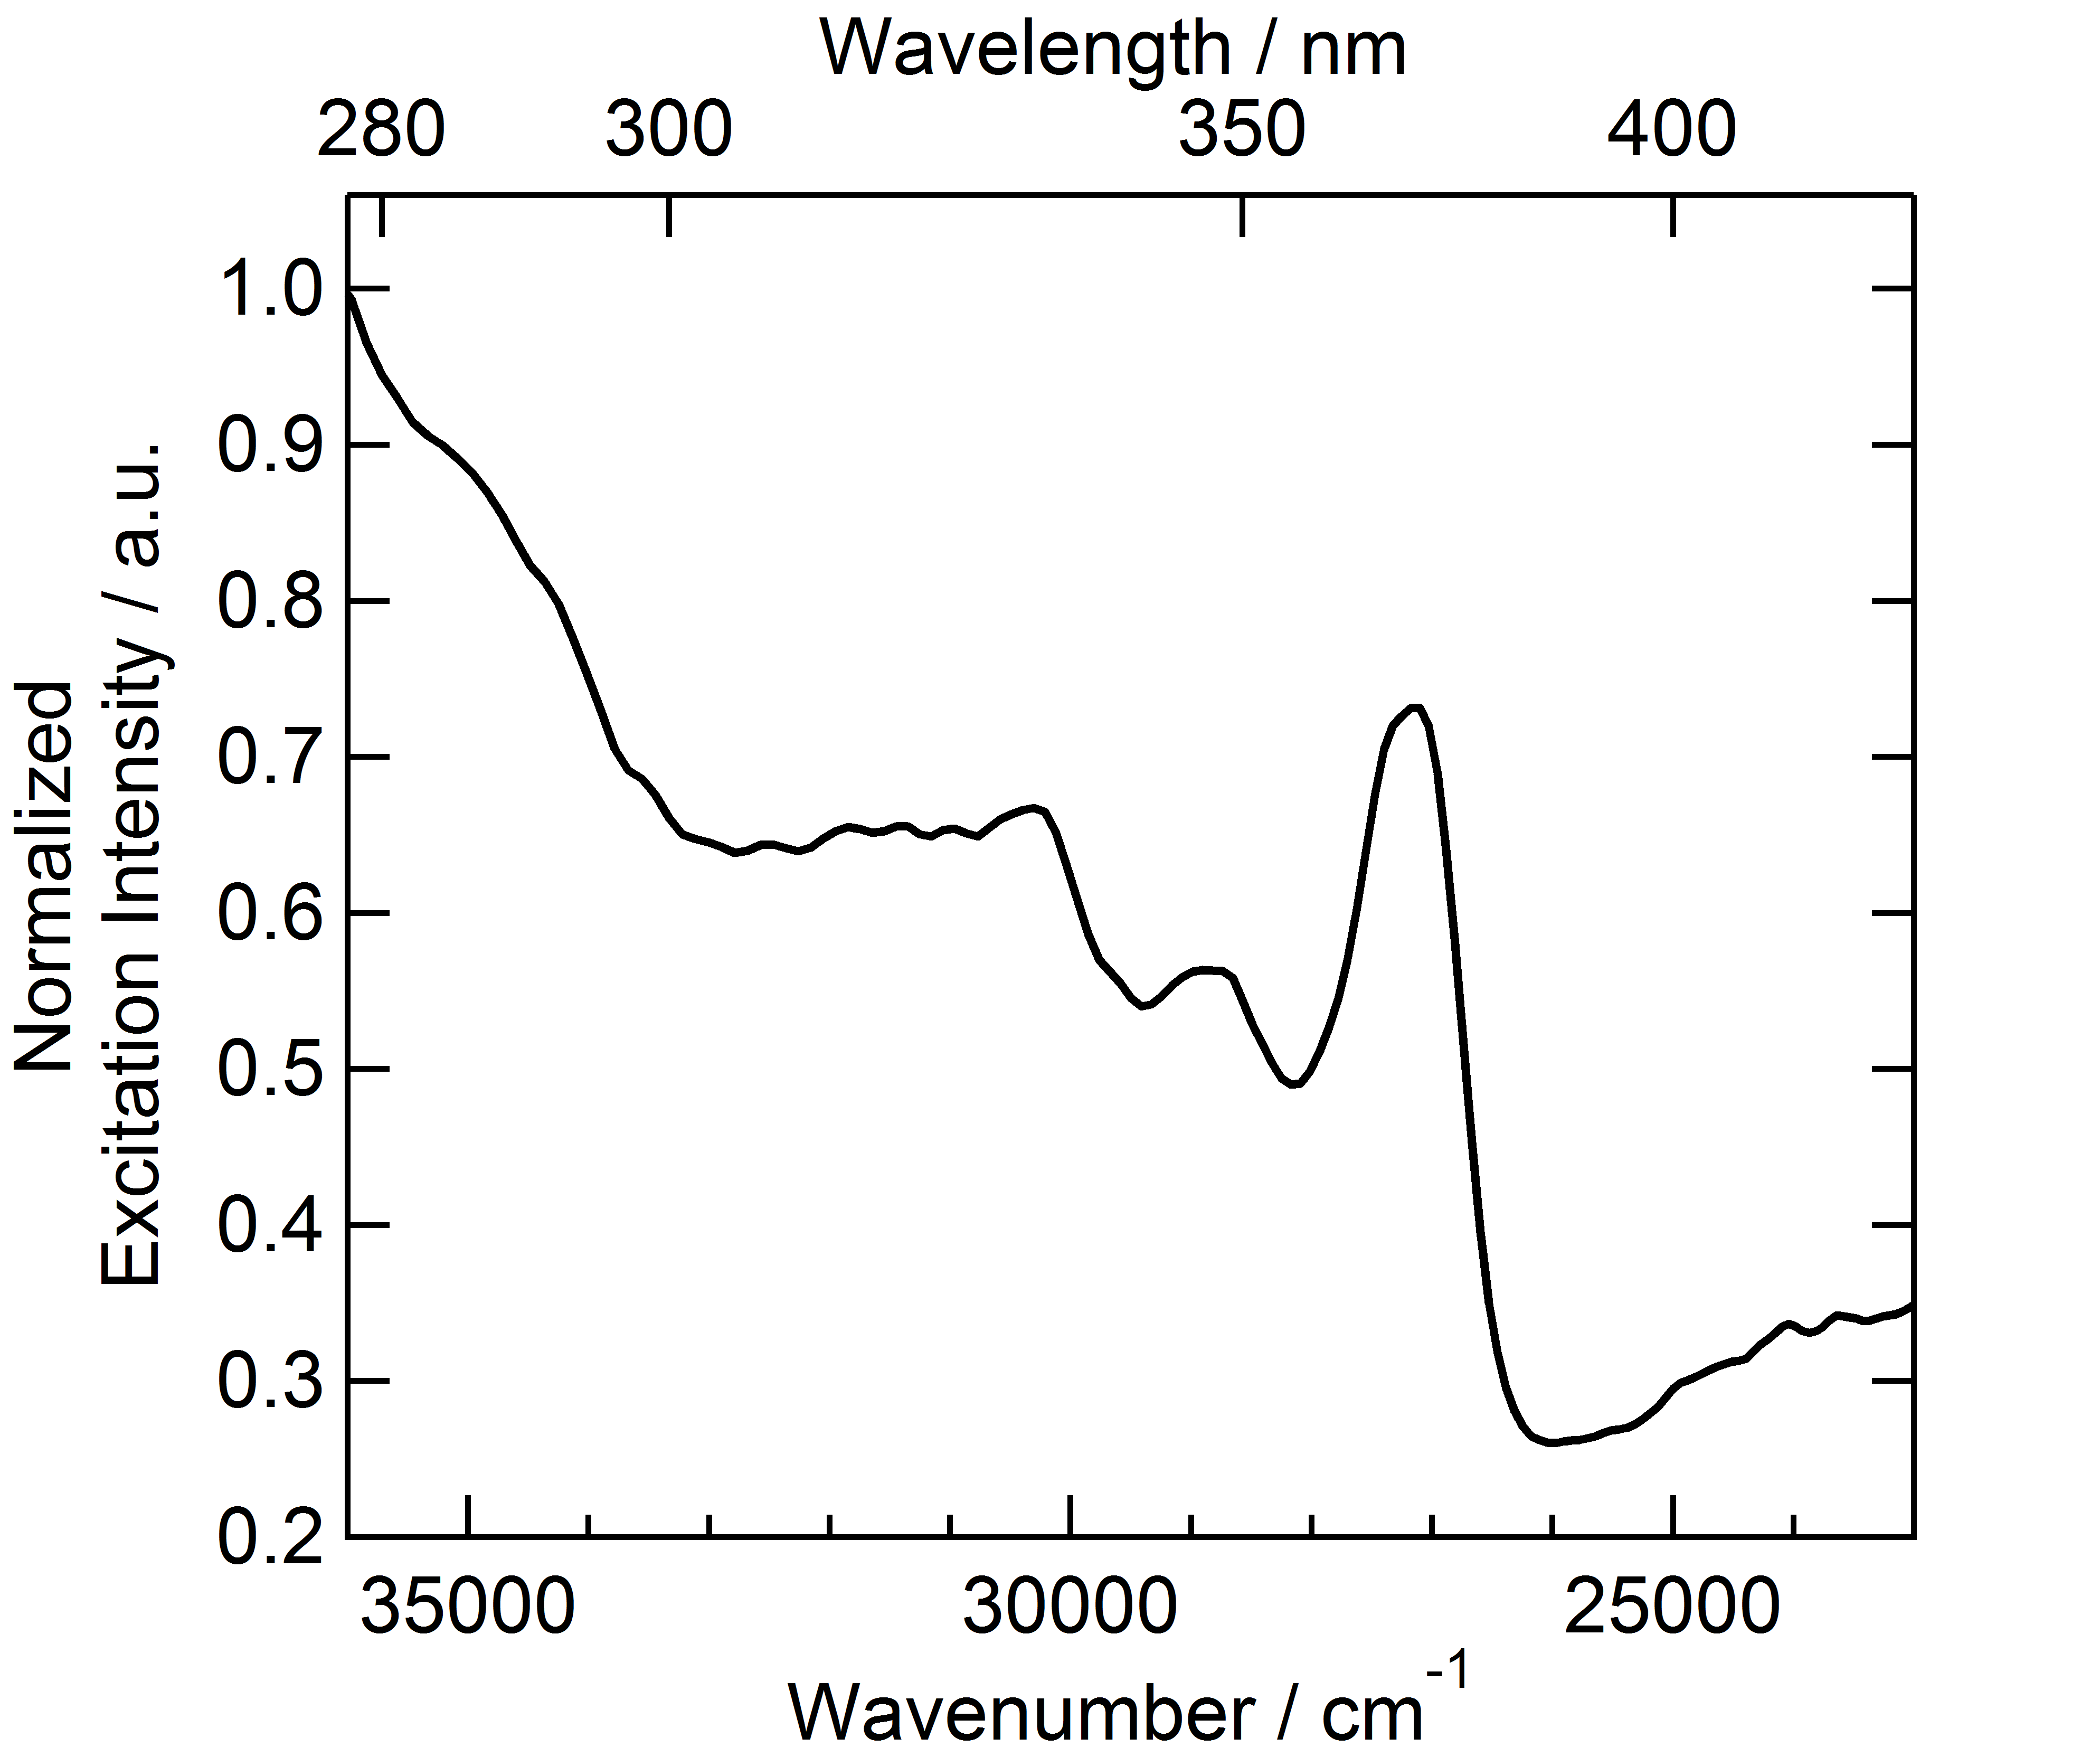


**Fig. S5**. Excitation spectrum of **3** (λem = 14388 cm-1 (695 nm)) in CH2Cl2 solution (C = 1.9×10-5 M) at 77 K.





**Fig. S6**. Experimental UV/vis absorption (open circles) and excitation (open squares) spectra in solution (*c* = 4·10-5 M) of **3** in CH2Cl2.


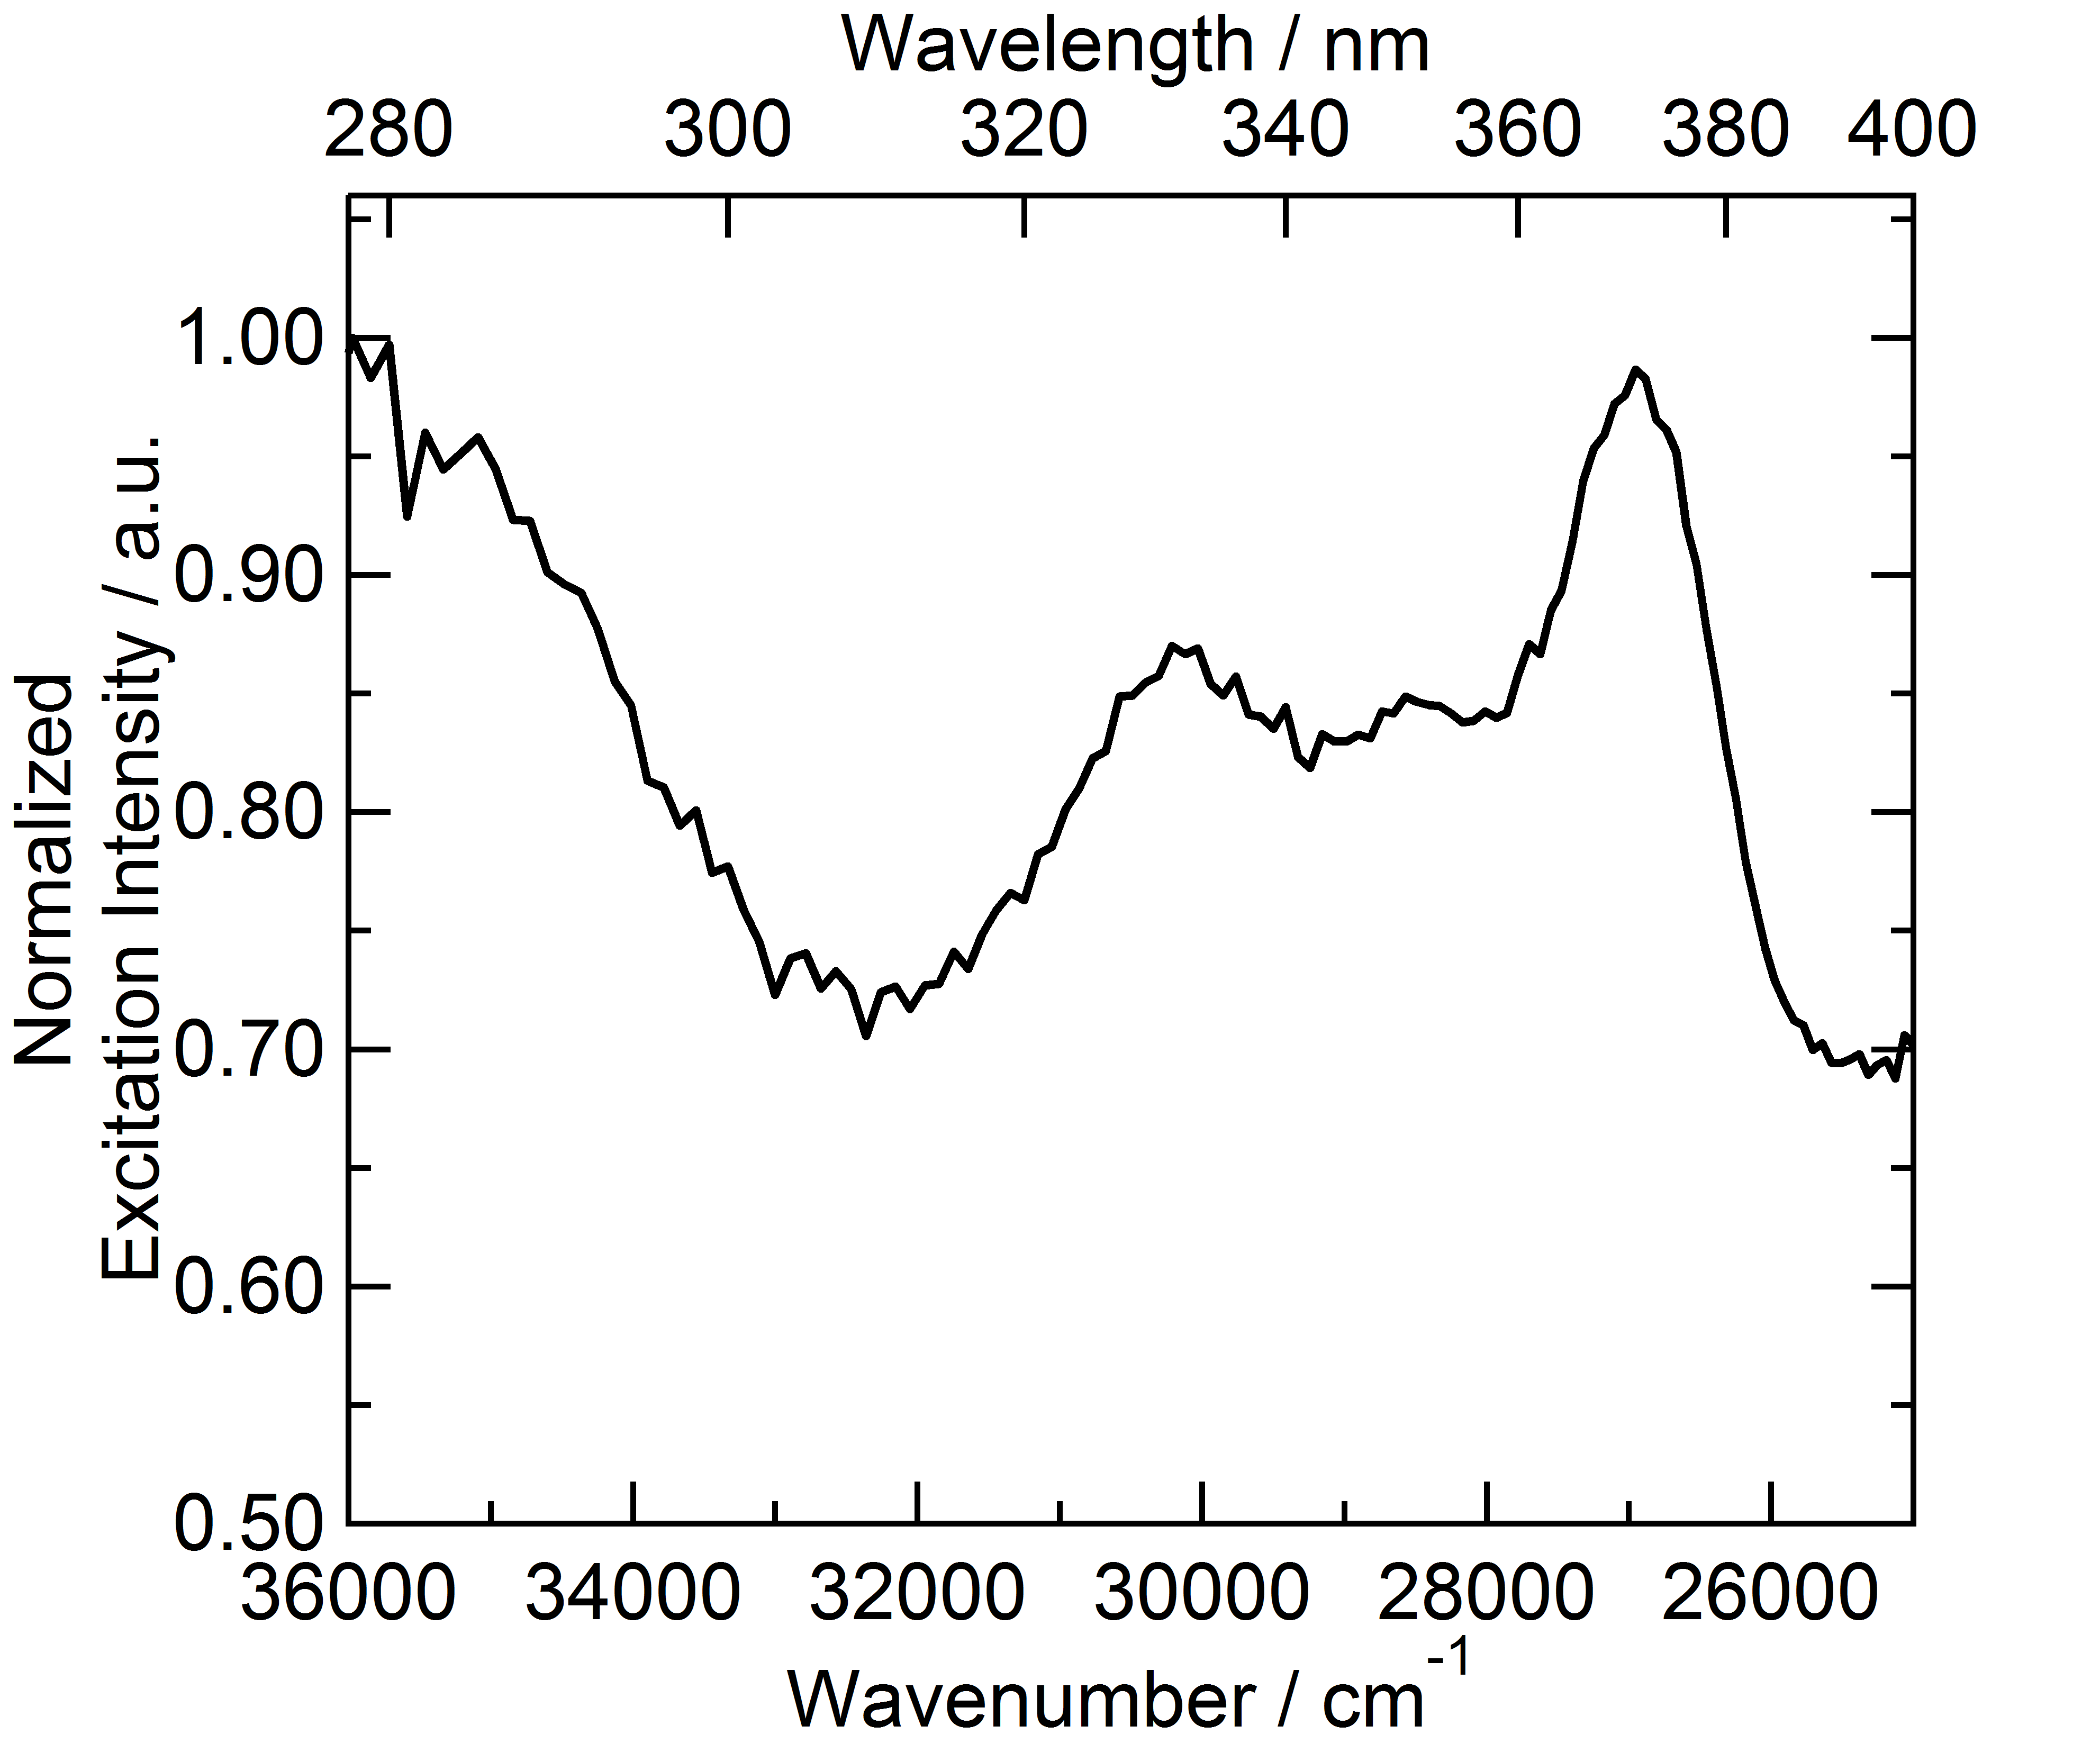


**Fig. S7**. Solid-state excitation spectrum of **3** (λem = 13605 cm-1 (735 nm)) at 77 K.
